# Supplementary material
Source: ML conference proceedings conference paper supplement (https://proceedings.neurips.cc/paper_files/paper/2022/hash/77e5109bdf9f337e11e004c22c8ac89d-Abstract.html)
Supplement: Supplementary file 1 [file 77e5109bdf9f337e11e004c22c8ac89d-Supplemental-Conference.pdf]

# Appendix

## A Visualizations

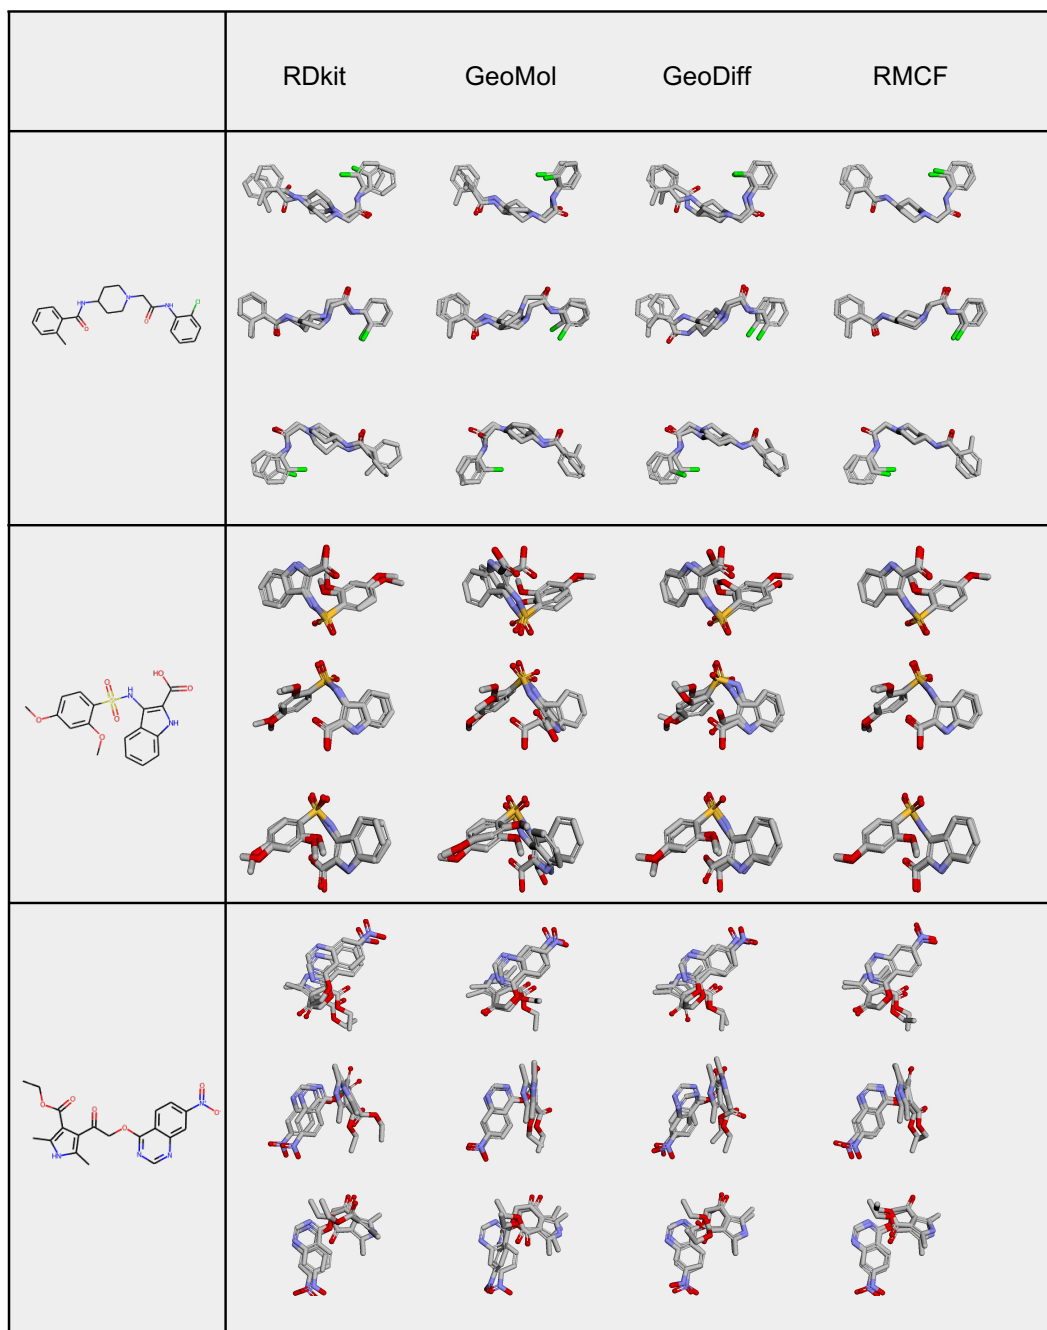

Figure 6: Examples of generated molecules from GEOM-Drugs dataset. For every model and molecule, we show three ground truths and the best-aligned conformations. Our model RMCF fits best with the references.

## B Graph Dynamic Programming Algorithm

---

**Algorithm 1** Graph Dynamic Programming for Searching the Best Partition

---

**Require:** the fragments type collection  $\mathcal{F}$ , the molecular graph  $G_m$

**Ensure:** the best molecular graph partition  $\mathcal{P}^*$

```

function DoF( $f$ )
  return  $\frac{1}{|\mathcal{C}_f|} \sum_{\mathcal{C}_f} \text{RMSD}(\mathcal{C}_f, \overline{\mathcal{C}_f})^2$ 
end function
function PARTITION( $G$ )
   $s \leftarrow 100, \mathcal{P} \leftarrow \{\}$ 
  for  $f \in \mathcal{F}$  do
    if IsSubstructure( $G, f$ ) then ▷ Determine if  $f$  is a substructure of  $G$ 
       $s_m \leftarrow 0, z \leftarrow 1, \mathcal{P}_m \leftarrow \{f\}$ 
       $F_r \leftarrow \text{REMOVE}(G, f)$  ▷ Cut the  $f$  and split  $G$  into fragments set  $F_r$  without  $f$ 
      for  $f \in F_r$  do
         $dof, \mathcal{P}_f \leftarrow \text{PARTITION}(f)$ 
         $s_m \leftarrow s + dof * |\mathcal{P}_f|, z \leftarrow z + |\mathcal{P}_f|, \mathcal{P}_m \leftarrow \mathcal{P}_m \cup \mathcal{P}_f$ 
      end for
       $s_m \leftarrow s_m / z$ 
    end if
    if  $s_m < s$  then
       $s \leftarrow s_m, \mathcal{P} \leftarrow \mathcal{P}_m$ 
    end if
    if  $\mathcal{P} = \{\}$  then
      return DoF( $G$ ),  $\{G\}$ 
    end if
  end for
end function
 $dof, \mathcal{P}^* \leftarrow \text{PARTITION}(G_m)$ 
return  $\mathcal{P}^*$ 

```

---

## C Sampling Algorithm

---

**Algorithm 2** Sampling Molecular Conformations From RMCF

---

**Require:** an RMCF  $\mathcal{G}$ , the number of conformations  $N_C$ , the number of sampling iterations  $N_S$

**Ensure:** a set  $S_C$  containing  $N_C$  conformations

```

 $S \leftarrow \{\}$ 
initialize a configuration  $\mathcal{X}$  randomly
for  $i \in [1, 2, \dots, N_S]$  do
  for  $n \in F \cup D$  do
     $U \leftarrow \{u | (n, u) \in E\}$  ▷  $x_u$  is fixed in this iteration
     $P \leftarrow \text{softmax} \left\{ \sum_{u \in U} \mathbf{E}_u[x_u] \mathbf{W}_{un} \mathbf{E}_n^T + \text{out}(\mathbf{h}_n) \right\}$  ▷ the value can be pre-computed
     $x_n \sim \text{Cat}(|n|, P)$ 
  end for
  add  $\mathcal{X}$  to  $S$ 
end for
compute the pairwise distance  $K$  with Eq. 11
 $S_C \leftarrow$  run clustering with  $k = N_C$  over  $S$  based on  $K$ 
return  $S_C$ 

```

---

## D QM9 Results

Table 3: Results on the **GEOM-QM9** dataset, without FF optimization.

| Models  | COV-R (%) $\uparrow$ |              | MAT-R ( $\text{\AA}$ ) $\downarrow$ |              | COV-P (%) $\uparrow$ |              | MAT-P ( $\text{\AA}$ ) $\downarrow$ |              |
|---------|----------------------|--------------|-------------------------------------|--------------|----------------------|--------------|-------------------------------------|--------------|
|         | Mean                 | Median       | Mean                                | Median       | Mean                 | Median       | Mean                                | Median       |
| CVGAE   | 0.09                 | 0.00         | 1.671                               | 1.609        | -                    | -            | -                                   | -            |
| GraphDG | 73.33                | 84.21        | 0.425                               | 0.397        | 43.90                | 35.33        | 0.581                               | 0.582        |
| CGCF    | 78.05                | 82.48        | 0.422                               | 0.390        | 36.49                | 33.57        | 0.662                               | 0.643        |
| ConfVAE | 77.84                | 88.20        | 0.415                               | 0.374        | 38.02                | 34.67        | 0.622                               | 0.609        |
| GeoMol* | 71.26                | 72.00        | 0.373                               | 0.373        | -                    | -            | -                                   | -            |
| ConfGF  | 88.49                | 94.31        | 0.267                               | 0.269        | 46.43                | 43.41        | 0.522                               | 0.512        |
| GeoDiff | 90.07                | 93.39        | 0.209                               | <b>0.199</b> | 52.79                | 50.29        | 0.445                               | 0.440        |
| DMCG    | <b>96.34</b>         | <b>99.53</b> | <b>0.207</b>                        | 0.200        | -                    | -            | -                                   | -            |
| RMCF-R  | 55.86                | 56.67        | 0.433                               | 0.414        | <b>84.86</b>         | <b>96.51</b> | <b>0.260</b>                        | <b>0.227</b> |
| RMCF-C  | 76.22                | 85.50        | 0.320                               | 0.289        | 83.10                | 91.44        | 0.283                               | 0.261        |

\* We follow the results reported by [Zhu et al. \[2022\]](#), [Xu et al. \[2022\]](#), which use the same data splits as us. GeoMol achieves higher scores in [Ganea et al. \[2021\]](#)'s data splits. COV-R: 91.52/100.0, MAT-R 0.225/0.193, COV-P 86.71/100.0, MAT-P 0.270/0.241

## E Hyperparamters

Table 4: Hyperparameter choices of RMCF and training phase

| Hyperparameters                           | Values             |
|-------------------------------------------|--------------------|
| <b>Message Passing Neural Network</b>     |                    |
| Number of MPNN Layers $N$                 | 6                  |
| Dimension of Embeddings $d_{embed}$       | 320                |
| Dimension of Hiddens $d_h$                | 320                |
| Dimension of Feed-forward Layers $d_{ff}$ | 1280               |
| Dropout Rate $P_{drop}$                   | 0.1                |
| <b>Markov Random Fields Layer</b>         |                    |
| Number of States $ f $ or $ g $           | 72                 |
| Dimension of Hiddens $\mathbb{D}$         | 320                |
| <b>Training</b>                           |                    |
| Batch Size                                | 256                |
| Learning Rate                             | $5 \times 10^{-4}$ |
| Max Training Steps                        | $1.2 \times 10^6$  |
| Optimizer                                 | Adam               |
| Learning Rate Scheduler                   | Linear             |

We conducted our experiments on 8 A100 GPUs and took about 80 hours to train RMCF on GEOM-Drugs.
